# Supplementary material for: Changes in Children and Youth’s Mental Health Presentations during COVID-19: A Study of Primary Care Practices in Northern Ontario, Canada
Source: MDPI journal article supplement (doi:10.3390/ijerph20166588), 2023-08-17
Supplement: s1 [file s1]

# Changes in Children and Youth's Mental Health Presentations During COVID-19: A Study of Primary Care Practices in Northern Ontario, Canada

Roya Daneshmand, PhD<sup>1,2\*</sup>, Shreedhar Acharya, MPH<sup>2</sup>, Barbara Zelek, MD<sup>2</sup>, Michael Cotterill, MD<sup>2</sup>, Brianne Wood, PhD<sup>1,2\*</sup>

## Supplemental Materials

**Table S1.** List of antidepressant/antianxiety prescriptions used for patients who diagnosed with anxiety or depression

| Class | Generic         | Brand Name |
|-------|-----------------|------------|
| SSRI  | citalopram      | Celexa     |
|       | fluoxetine      | Prozac     |
|       | sertraline      | Zoloft     |
|       | escitalopram    | Cipralex   |
|       | paroxetine      | Paxil      |
|       | fluvoxamine     | Luvox      |
| SNRI  | duloxetine      | Cymbalta   |
|       | venlafaxine     | Effexor    |
|       | desvenlafaxine  | Pristiq    |
|       | levomilnacipran | Fetzima    |
| Other | bupropion       | Wellbutrin |
|       | mirtazapine     | Remeron    |
|       | vortioxetine    | Trintellix |
|       | vilazodone      | Viibryd    |
|       | agomelatine     | Valdoxan   |
|       | moclobemide     | Mannerix   |
|       | lorazepam       |            |
|       | clonazepam      |            |
|       | alprazolam      |            |
|       | diazepam        |            |
|       | oxazepam        |            |

**Table S2.** NORTHH patients' cohort characteristics

| Age, year | Male, N (%) | Female, N (%) |
|-----------|-------------|---------------|
| < 10      | 1034 (8.8)  | 1003 (8.6)    |
| 10-25     | 2048 (17.4) | 1926 (16.6)   |
| 26-50     | 3228 (27.4) | 3300 (28.4)   |
| 51-65     | 2832 (24.1) | 2695 (23.2)   |
| 65 <      | 2624 (22.3) | 2685 (23.2)   |

**Table S3.** Comparing the predicted rate of primary care visit in children and youth between pre- and during the COVID-19 pandemic

| Predicted Rate of Primary Care Visit per 10000 person-month in Pre-Pandemic | Predicted Rate of Primary Care Visit per 10000 person-month- During Pandemic | Relative Change in Predicted Rate of primary care visit |
|-----------------------------------------------------------------------------|------------------------------------------------------------------------------|---------------------------------------------------------|
|-----------------------------------------------------------------------------|------------------------------------------------------------------------------|---------------------------------------------------------|

# Changes in Children and Youth's Mental Health Presentations During COVID-19: A Study of Primary Care Practices in Northern Ontario, Canada

Roya Daneshmand, PhD <sup>1,2\*</sup>, Shreedhar Acharya, MPH<sup>2</sup>, Barbara Zelek, MD<sup>2</sup>, Michael Cotterill, MD<sup>2</sup>, Brianne Wood, PhD<sup>1,2\*</sup>

|                   | (June 1, 2018-February 28, 2020) |       |        | (April 1, 2020-December 31, 2021) |       |        |       |        |        |
|-------------------|----------------------------------|-------|--------|-----------------------------------|-------|--------|-------|--------|--------|
|                   | Total                            | Male  | Female | Total                             | Male  | Female | Total | Male   | Female |
| <b>Total</b>      | 72.3                             | 217.3 | 194.4  | 117.8                             | 325.0 | 319.9  | 62.9  | 49.6   | 64.6   |
| <b>Age, years</b> |                                  |       |        |                                   |       |        |       |        |        |
| 10-14             | 193.2                            | 238.2 | 139.5  | 281.8                             | 97.1  | 431.2  | 45.9  | -59.2* | 209.0  |
| 15-19             | 160.4                            | 230.1 | 144.8  | 442.0                             | 402.8 | 425.0  | 175.6 | 75.0   | 193.4  |
| 20-25             | 224.7                            | 204.1 | 238.3  | 267.4                             | 335.7 | 226.4  | 19.0  | 64.5   | -5.0 * |

\* Non-significant

**Table S4.** Comparing the predicted rate of antidepressant/antianxiety prescriptions in children and youth between pre- and during the COVID-19 pandemic

|                   | Predicted Rate of Prescription per 10000 person-month in Pre-Pandemic (June 1, 2018-February 28, 2020) |       |        | Predicted Rate of Prescription per 10000 person-month-During Pandemic (April 1, 2020-December 31, 2021) |       |        | Relative Change in Predicted Rate of prescription |        |        |
|-------------------|--------------------------------------------------------------------------------------------------------|-------|--------|---------------------------------------------------------------------------------------------------------|-------|--------|---------------------------------------------------|--------|--------|
|                   | Total                                                                                                  | Male  | Female | Total                                                                                                   | Male  | Female | Total                                             | Male   | Female |
| <b>Total</b>      | 222.4                                                                                                  | 232.7 | 211.0  | 296.9                                                                                                   | 256.3 | 317.4  | 33.5                                              | 10.1   | 50.4   |
| <b>Age, years</b> |                                                                                                        |       |        |                                                                                                         |       |        |                                                   |        |        |
| 10-14             | 70.5                                                                                                   | 65.1  | 50.2   | 774.6                                                                                                   | 843.0 | 630.6  | 998.9                                             | 1194.2 | 1156.5 |
| 15-19             | 192.6                                                                                                  | 219.6 | 189.3  | 335.3                                                                                                   | 325.7 | 334.2  | 74.1                                              | 48.3   | 76.5   |
| 20-25             | 254.2                                                                                                  | 248.5 | 256.8  | 225.3                                                                                                   | 205.4 | 233.5  | -11.3                                             | -17.3  | -9.1   |
